# Supplementary material
Source: publisher figshare collection journal article supplement (https://frontiersin.figshare.com/ndownloader/files/15201038)
Supplement: Supplementary file [file 15201038]

## Supplementary Material

### Supplementary Figures

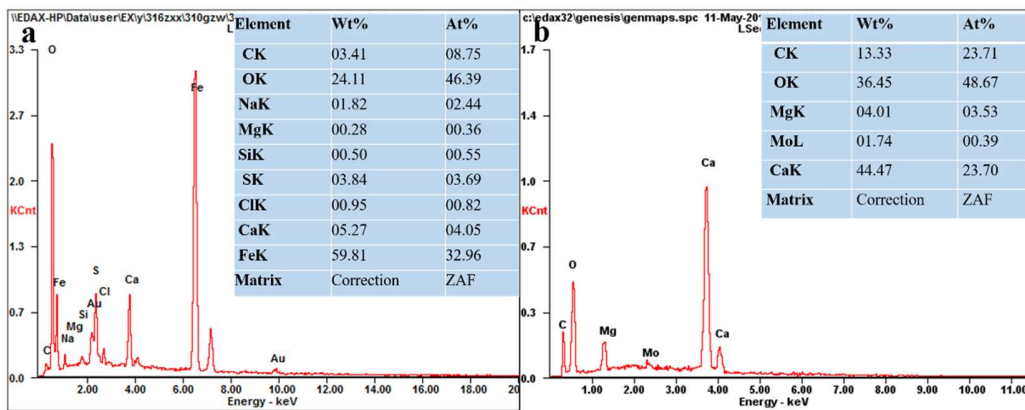

**Supplementary Figure 1.** EDS analysis of coupons in medium with (a) only *V. natriegens* and (b) co-cultures of *V. natriegens* and *B. subtilis*.

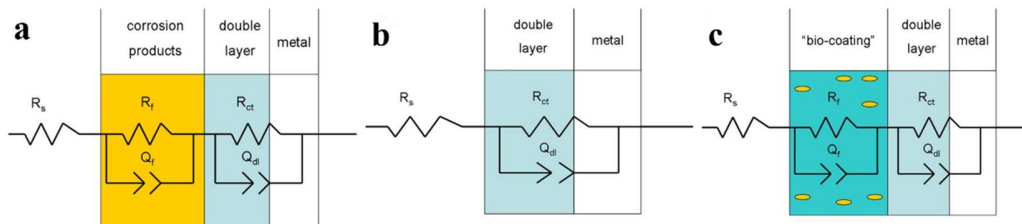

**Supplementary Figure 2.** Equivalent circuits used for simulate experimental impedance diagrams for the coupons in medium with (a) only *V. natriegens* and (b) co-cultures of *V. natriegens* and *B. subtilis* (before day 7) (c) co-cultures of *V. natriegens* and *B. subtilis* (day 9).
